# Supplementary material
Source: ML conference proceedings conference paper supplement (https://openreview.net/forum?id=1V28zvLJMg)
Supplement: supplementary_material [file attachment]

Query: a mouse is sitting on the cat's paw

Video

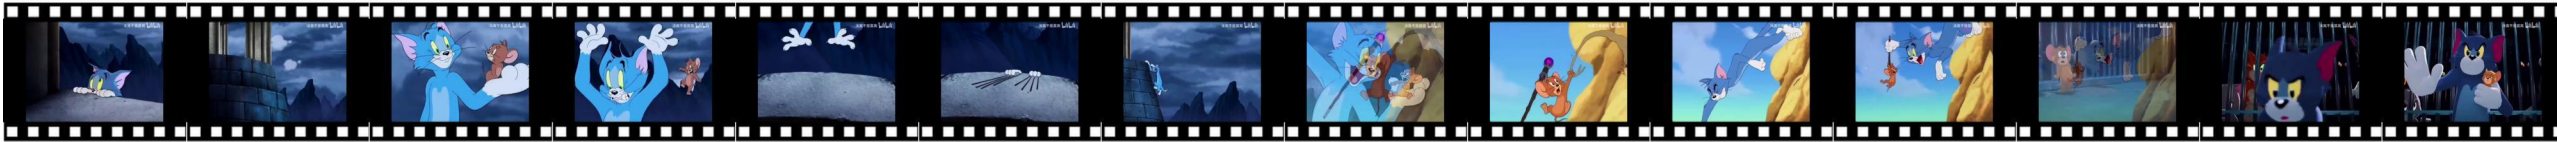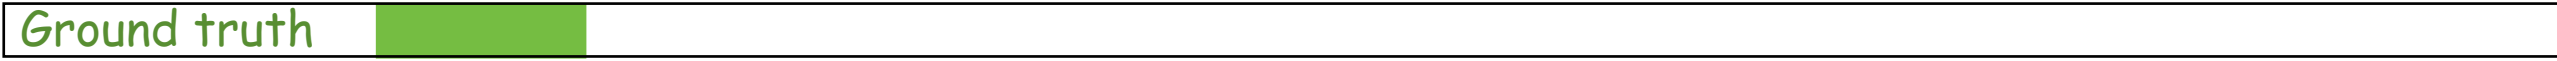

Moments

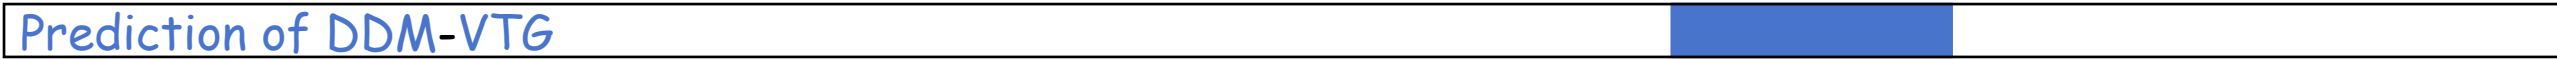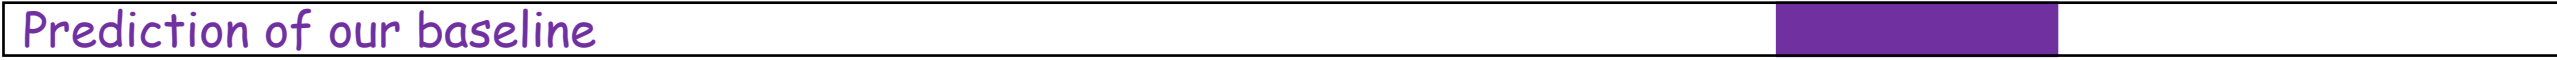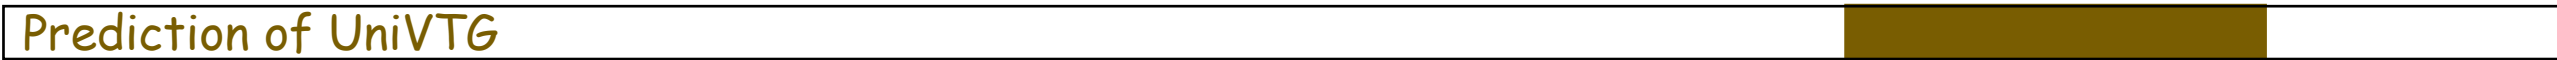

Uncertainty of DDM-VTG

Uncertainty of our baseline

Uncertainty of UniVTG

Aleatoric

[0.99,0.99]

[0.33,0.08]

-

Epistemic

[0.99,1.00]

[0.92,0.71]

-

Query: a man closes the door of the wardrobe

Video

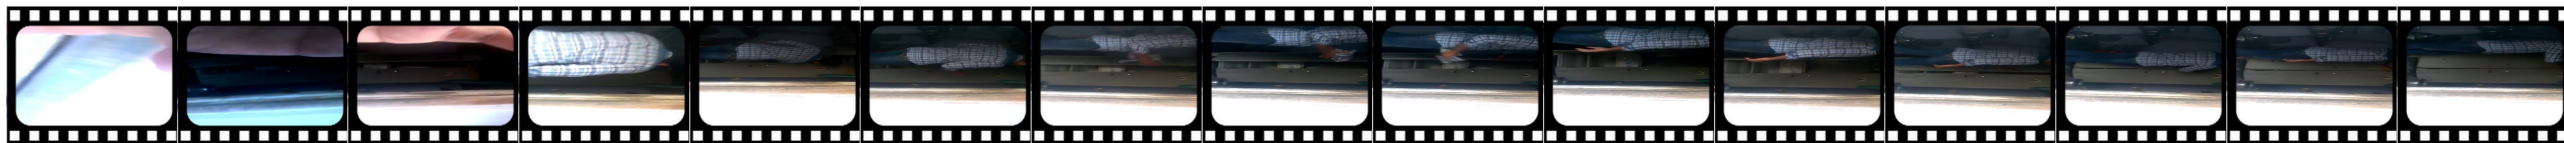

Ground truth

Prediction of DDM-VTG

Prediction of our baseline

Prediction of UniVTG

Uncertainty of DDM-VTG

Uncertainty of our baseline

Uncertainty of UniVTG

Aleatoric

[0.99,0.99]

[0.26,0.70]

-

Epistemic

[0.91,0.84]

[0.93,0.55]

-

Query: a man enters the kitchen

Video

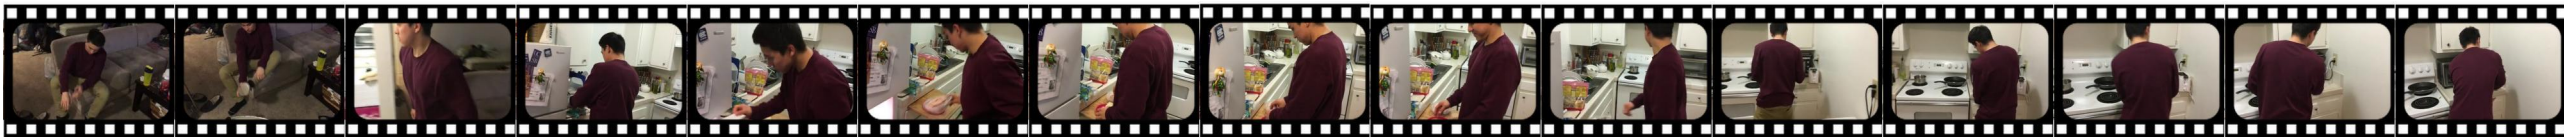

Ground truth

Prediction of DDM-VTG

Prediction of our baseline

Prediction of UniVTG

Uncertainty of DDM-VTG

Uncertainty of our baseline

Uncertainty of UniVTG

Aleatoric

[1.00,1.00]

[0.98,1.00]

-

Epistemic

[0.35,0.29]

[0.99,1.00]

-

# Query(+): a man is watching computer

Video

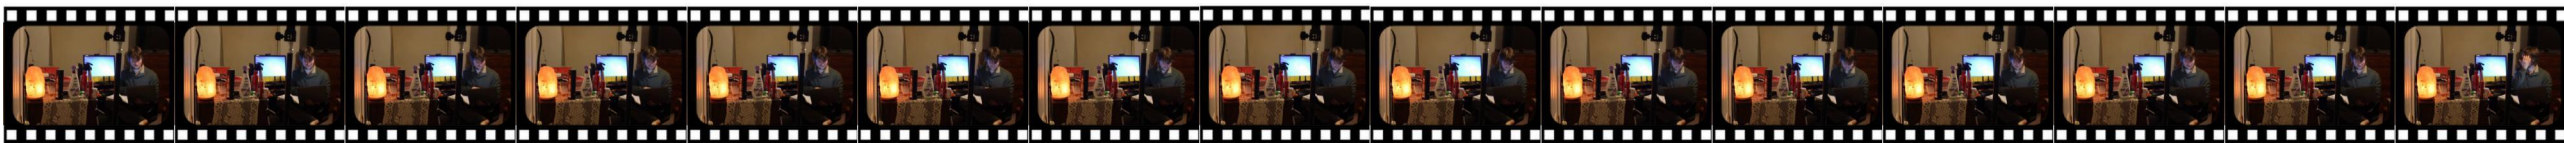

Moments

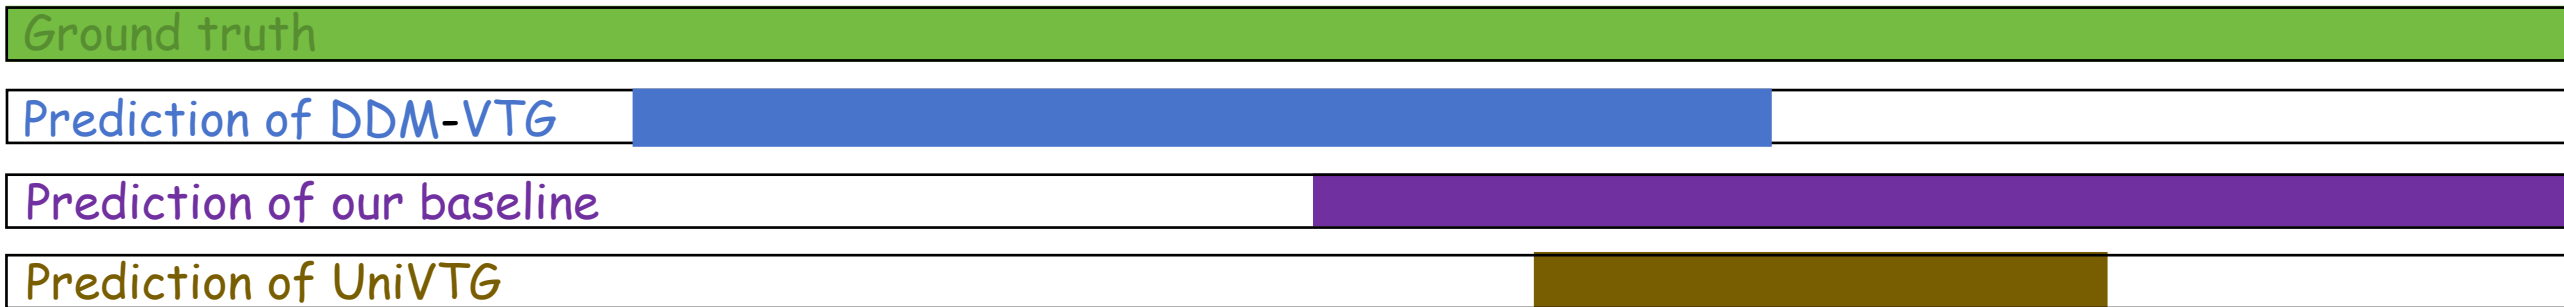

Uncertainty of DDM-VTG

Uncertainty of our baseline

Uncertainty of UniVTG

Aleatoric

[0.35,0.39]

[0.35,0.40]

-

Epistemic

[0.51,0.64]

[0.96,0.68]

-

Query(-): a man is watching television

Video



Ground truth

Moments

Prediction of DDM-VTG

Prediction of our baseline

Prediction of UniVTG

Uncertainty of DDM-VTG

Uncertainty of our baseline

Uncertainty of UniVTG

Aleatoric

[0.29,0.37]

[0.33,0.38]

-

Epistemic

[0.99,1.00]

[0.92,0.71]

-
